# Supplementary material for: Synthesis of a photocurable acrylated poly(ethylene glycol)-co-poly(xylitol sebacate) copolymers hydrogel 3D printing ink for tissue engineering
Source: Royal Society of Chemistry journal article supplement (doi:10.1039/c9ra03637g), 2019-01-01
Supplement: c9ra03637g1.pdf [file c9ra03637g1.pdf]

### Supporting information

## Synthesis of a photocurable acrylated poly(ethylene glycol)-co-poly(xylitol sebacate) copolymers hydrogel for tissue engineering and 3D printing ink

Yicai Wang,<sup>a</sup> Yuan Li,<sup>\*a</sup> Xiaoling Yu,<sup>a</sup> Qizhi Long,<sup>a</sup> and Tian Zhang<sup>\*ab</sup>

<sup>a</sup> School of Chemistry, Chemical Engineering and Life Science, Wuhan University of Technology, Wuhan, 430070

\*Corresponding Author: Yuan Li, E-mail: [liyuan2015@whut.edu.cn](mailto:liyuan2015@whut.edu.cn); Tian Zhang, [tzhang@whut.edu.cn](mailto:tzhang@whut.edu.cn)

Table S1. Molar ratios of PEXS monomers.

| Sample code | PEG <sub>6000</sub> (g) | SAA (g) | Xylitol (g) | Molar ratio (PEG:SAA:Xylitol) | PEG (wt%) |
|-------------|-------------------------|---------|-------------|-------------------------------|-----------|
| PEXS-70%    | 35                      | 8.56    | 6.44        | 1.4:10:10                     | 70%       |
| PEXS-60%    | 30                      | 11.41   | 8.59        | 0.9:10:10                     | 60%       |
| PEXS-50%    | 25                      | 14.27   | 10.73       | 0.6:10:10                     | 50%       |

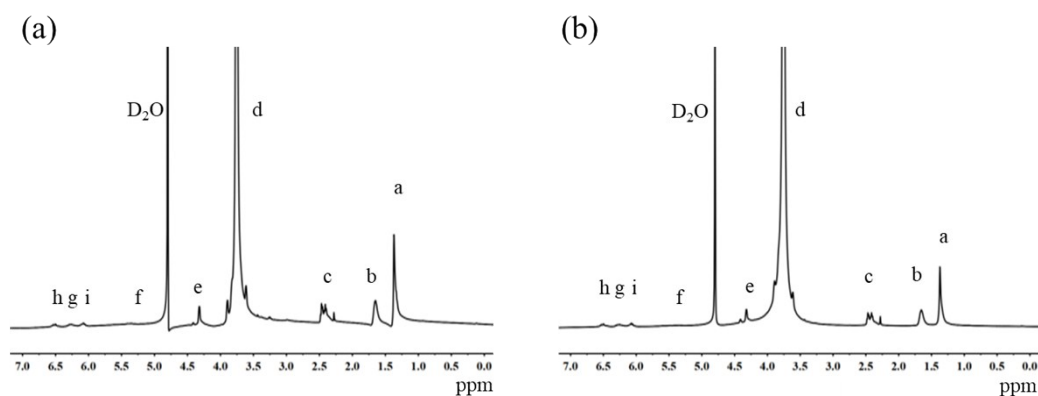

Fig. S1 <sup>1</sup>H-NMR spectra of PEXS-2A (a) and PEXS-4A (b) copolymers.

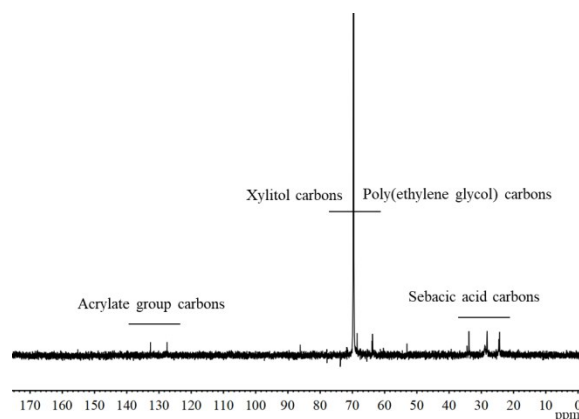

Fig. S2 <sup>13</sup>C-NMR spectrum of PEXS-3A copolymer.

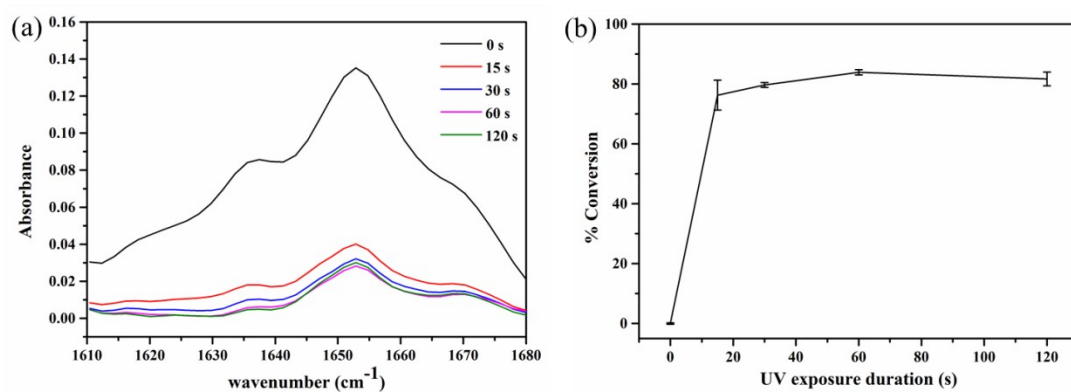

Fig. S3 Photopolymerization kinetic of PEXS-3A hydrogel. (a) Fourier-transform infrared spectra of PEXS-3A copolymer solution and freeze-dried PEXS-3A hydrogels after 15, 30, 60 and 120 seconds of UV exposure. (b) Percentage of conversion of vinyl bonds (C=C) (peak at  $1650 \text{ cm}^{-1}$ ) calculated using freeze-dried hydrogels and normalized to the C=O stretching peak at  $1733 \text{ cm}^{-1}$  as an internal standard at different UV (365nm) exposure duration.

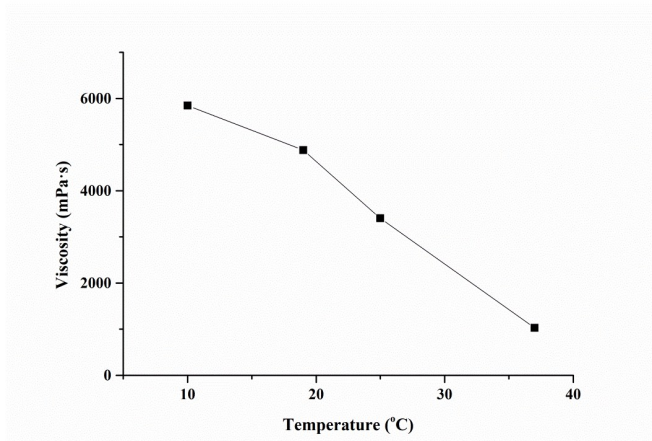

Fig. S4 Viscosity curve of PEXS-3A (25% w/v) copolymer in relation with temperature.

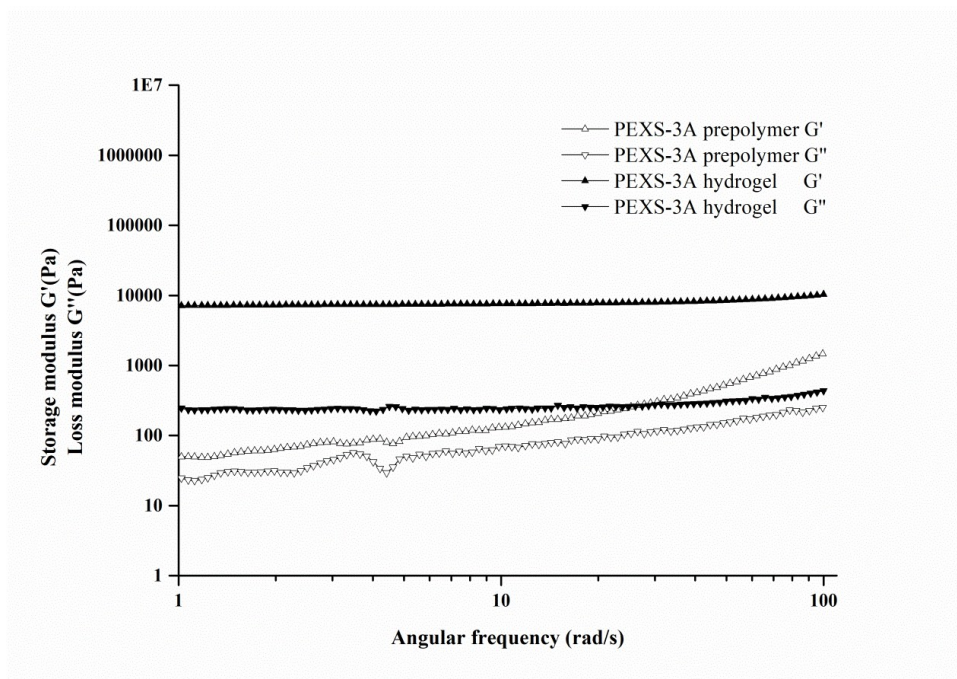

Fig. S5 Rheological characterization of PEXS-3A copolymer and hydrogel.

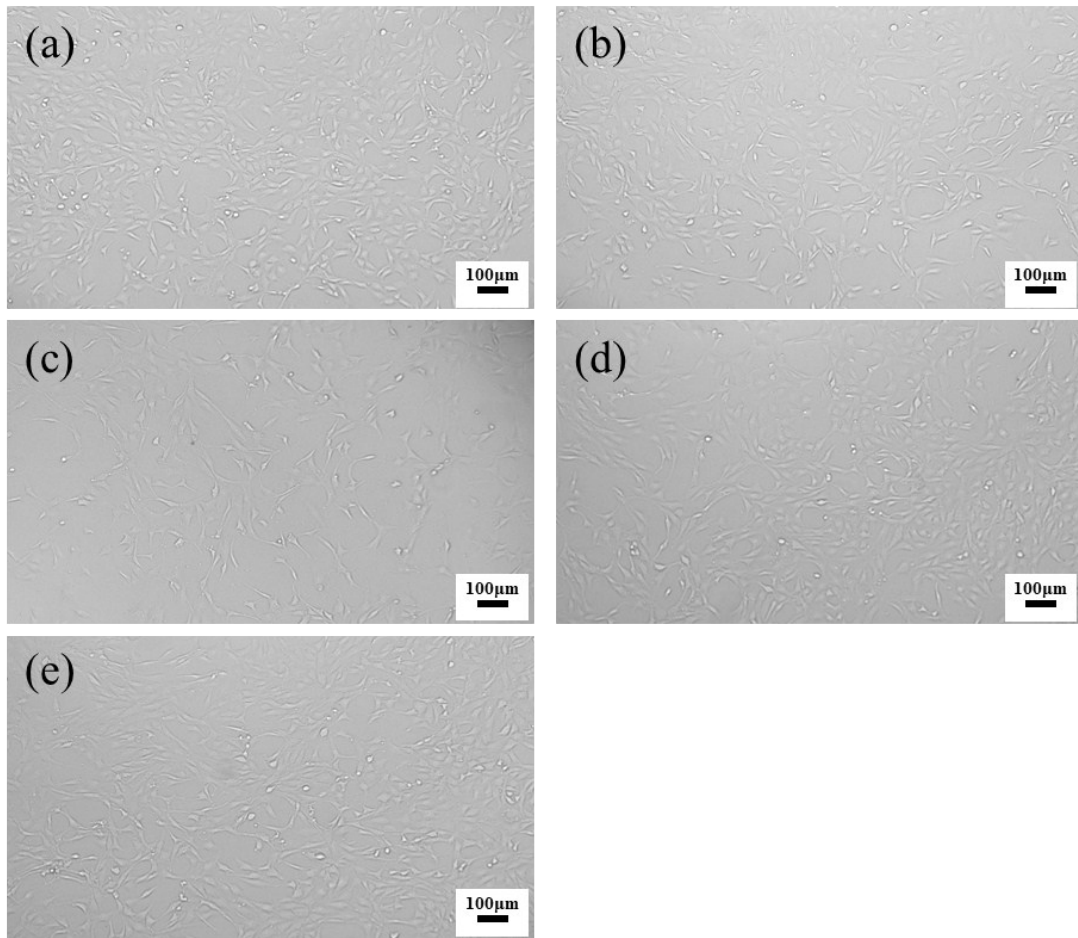

Fig. S6 3T3 fibroblast cells cultivated in (a) DMEM pristine medium, (b) PDLLA, (c) PEXS-2A, (d) PEXS-3A or (e) PEXS-4A hydrogel extractant.
